# Supplementary material for: Cross-linked Composite Gel Polymer Electrolyte using Mesoporous Methacrylate-Functionalized SiO2 Nanoparticles for Lithium-Ion Polymer Batteries
Source: PubMed Central journal article supplement (PMC4870681; doi:10.1038/srep26332), 2016-05-18
Supplement: srep26332-s1.pdf [file srep26332-s1.pdf]

# Supplementary Information

## **Cross-linked Composite Gel Polymer Electrolyte using Mesoporous Methacrylate-Functionalized SiO<sub>2</sub> Nanoparticles for Lithium-Ion Polymer Batteries**

Won-Kyung Shin<sup>1</sup>, Jinhyun Cho<sup>1</sup>, Aravindaraj G. Kannan<sup>1</sup>, Yoon-Sung Lee<sup>2</sup> & Dong-Won Kim<sup>1,\*</sup>

<sup>1</sup>Department of Chemical Engineering, Hanyang University, Seoul 04763, South Korea

<sup>2</sup>Center for Energy Convergence, Korea Institute of Science and Technology, Seoul 02792, South Korea

\*dongwonkim@hanyang.ac.kr

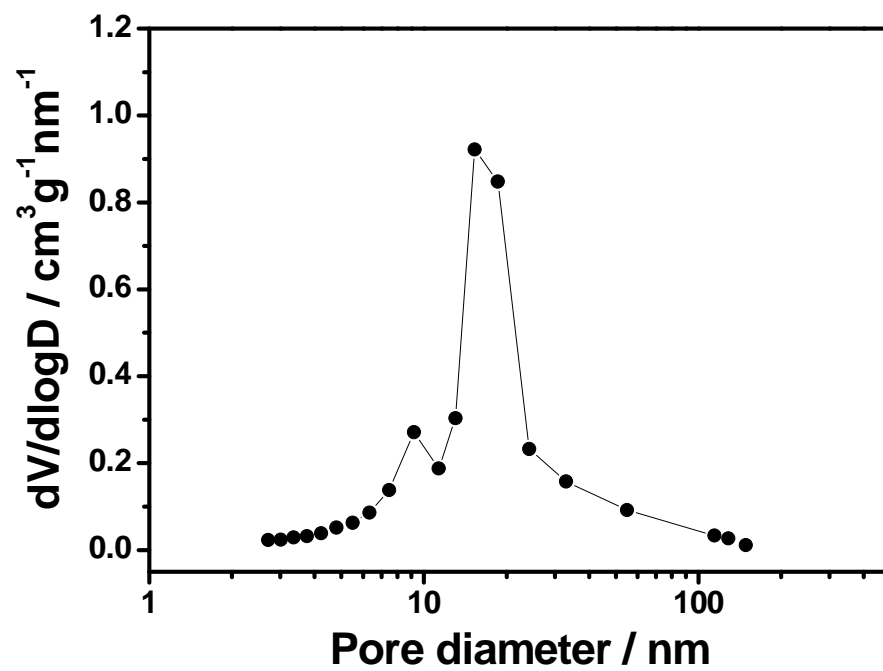

**Figure S1.** Pore size distribution of the mesoporous MA-SiO<sub>2</sub> particles.

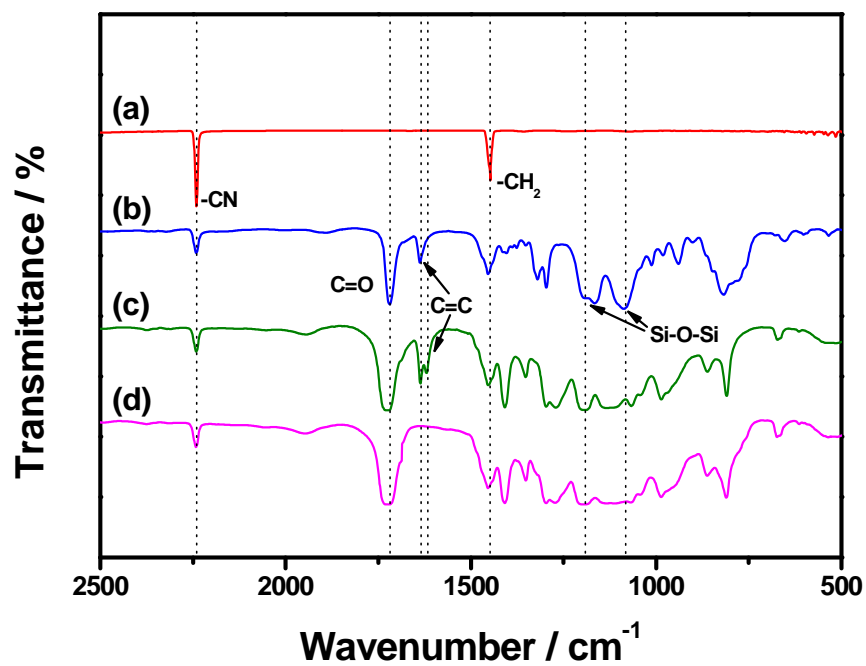

**Figure S2.** FT-IR spectra of (a) fibrous PAN membrane, (b) composite PAN membrane with mesoporous MA-SiO<sub>2</sub> nanoparticles, and cross-linked composite polymer electrolyte (c) before and (d) after thermal cross-linking.

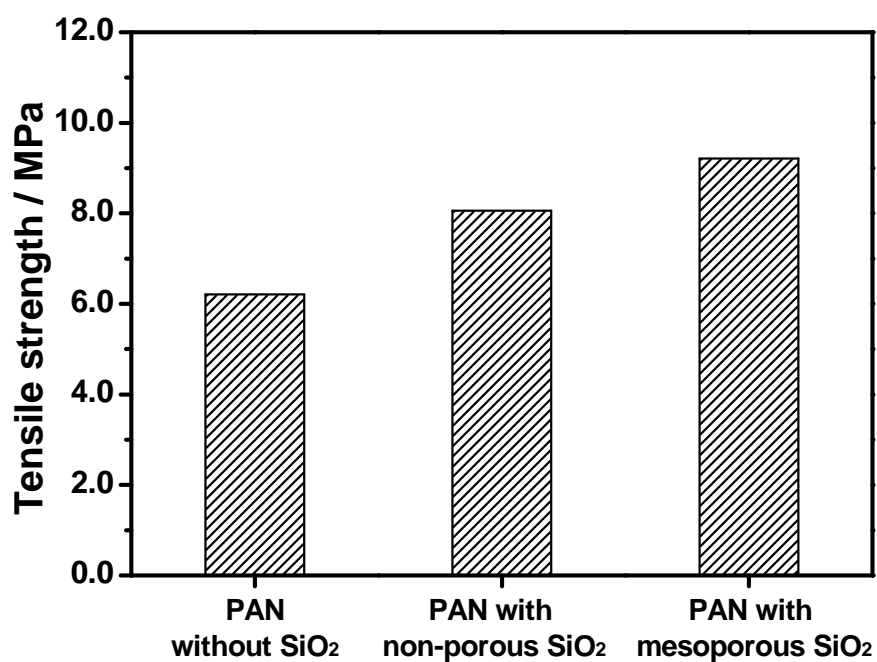

**Figure S3.** Mechanical strength of cross-linked PAN-based polymer membranes containing different types of SiO<sub>2</sub> particles.

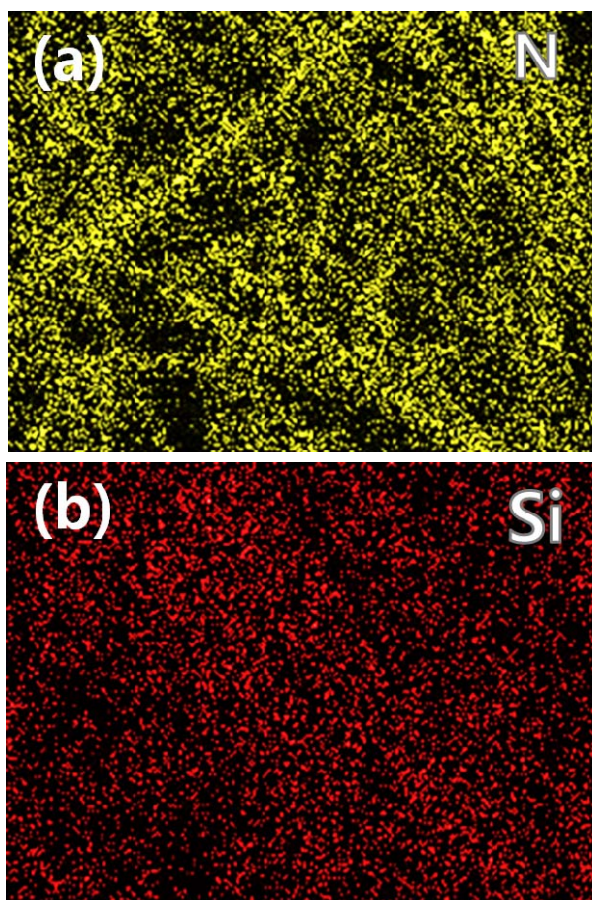

**Figure S4.** EDS elemental mapping images corresponding to (a) N and (b) Si in the cross-linked composite gel polymer electrolyte with mesoporous MA-SiO<sub>2</sub> nanoparticles.
